# Supplementary material
Source: MDPI journal article supplement (https://www.mdpi.com/1999-4907/13/10/1602)
Supplement: s1 [file s1]

**Table S1.** Proportion of individuals in 8 genera that comprised 4% or more of the total sample within each combination of main effects (control and utility plots; pruned and unpruned trees). Mean tree sizes (diameter in cm measured 1.4 m above ground or “DBH”; tree height in m) and annual ecosystem benefits (\$/yr.) are also included.

|                                 |                                          | <i>Acer</i> | <i>Betula</i> | <i>Fraxinus</i> | <i>Pinus</i> | <i>Prunus</i> | <i>Quercus</i> | <i>Tilia</i> | <i>Ulmus</i> |
|---------------------------------|------------------------------------------|-------------|---------------|-----------------|--------------|---------------|----------------|--------------|--------------|
| All Trees                       | Proportion of Genus in Total Sample      | 24%         | 5%            | 4%              | 14%          | 6%            | 18%            | 4%           | 4%           |
| Pruned Trees in Control Plots   | Proportion of Genus Within the Subsample | 34%         | 18%           | 6%              | 4%           | 1%            | 2%             | 7%           | 1%           |
|                                 | DBH (cm)                                 | 45          | 63            | 39              | 27           | 47            | 60             | 36           | 55           |
|                                 | Height (m)                               | 13          | 9             | 12              | 11           | 8             | 16             | 11           | 13           |
|                                 | Total Annual Benefits (\$)               | 9.01        | 13.25         | 6.77            | 2.10         | 5.59          | 10.26          | 11.93        | 13.19        |
|                                 | Structural Value (\$)                    | 3034.36     | 2176.63       | 1973.28         | 1392.83      | 1605.25       | 4112.74        | 1976.71      | 4089.12      |
| Unpruned Trees in Control Plots | Proportion of Genus Within the Subsample | 20%         | 19%           | 12%             | 6%           | 3%            | 9%             | 1%           | 1%           |
|                                 | DBH (cm)                                 | 25          | 22            | 28              | 19           | 31            | 26             | 28           | 14           |
|                                 | Height (m)                               | 10          | 12            | 14              | 10           | 9             | 11             | 9            | 8            |
|                                 | Total Annual Benefits (\$)               | 2.57        | 1.71          | 0.79            | 1.14         | 3.23          | 2.70           | 3.49         | 2.60         |
|                                 | Structural Value (\$)                    | 1011.31     | 514.09        | 374.78          | 735.73       | 879.43        | 1035.90        | 829.44       | 431.42       |

|                                       |                                                | <i>Acer</i> | <i>Betula</i> | <i>Fraxinus</i> | <i>Pinus</i> | <i>Prunus</i> | <i>Quercus</i> | <i>Tilia</i> | <i>Ulmus</i> |
|---------------------------------------|------------------------------------------------|-------------|---------------|-----------------|--------------|---------------|----------------|--------------|--------------|
| Pruned Trees<br>in Utility Plots      | Proportion of<br>Genus Within the<br>Subsample | 26%         | 20%           | 16%             | 4%           | 7%            | 2%             | 4%           | 2%           |
|                                       | DBH (cm)                                       | 41          | 14            | 28              | 32           | 36            | 42             | 41           | 41           |
|                                       | Height (m)                                     | 13          | 7             | 13              | 14           | 9             | 16             | 11           | 12           |
|                                       | Total Annual<br>Benefits (\$)                  | 6.04        | 0.76          | 3.10            | 1.89         | 4.06          | 5.53           | 11.25        | 5.70         |
|                                       | Structural Value<br>(\$)                       | 2492.50     | 301.11        | 1156.57         | 1671.48      | 1401.76       | 2491.39        | 2466.30      | 2130.88      |
| Unpruned<br>Trees in Utility<br>Plots | Proportion of<br>Genus Within the<br>Subsample | 13%         | 10%           | 18%             | 11%          | 7%            | 5%             | 1%           | 6%           |
|                                       | DBH (cm)                                       | 14          | 7             | 5               | 9            | 13            | 12             | 22           | 17           |
|                                       | Height (m)                                     | 6           | 5             | 5               | 5            | 4             | 5              | 5            | 7            |
|                                       | Total Annual<br>Benefits (\$)                  | 1.91        | 0.79          | 0.15            | 0.28         | 1.93          | 0.67           | 6.48         | 3.26         |
|                                       | Structural Value<br>(\$)                       | 391.17      | 119.73        | 75.68           | 189.63       | 384.12        | 238.08         | 935.44       | 553.44       |

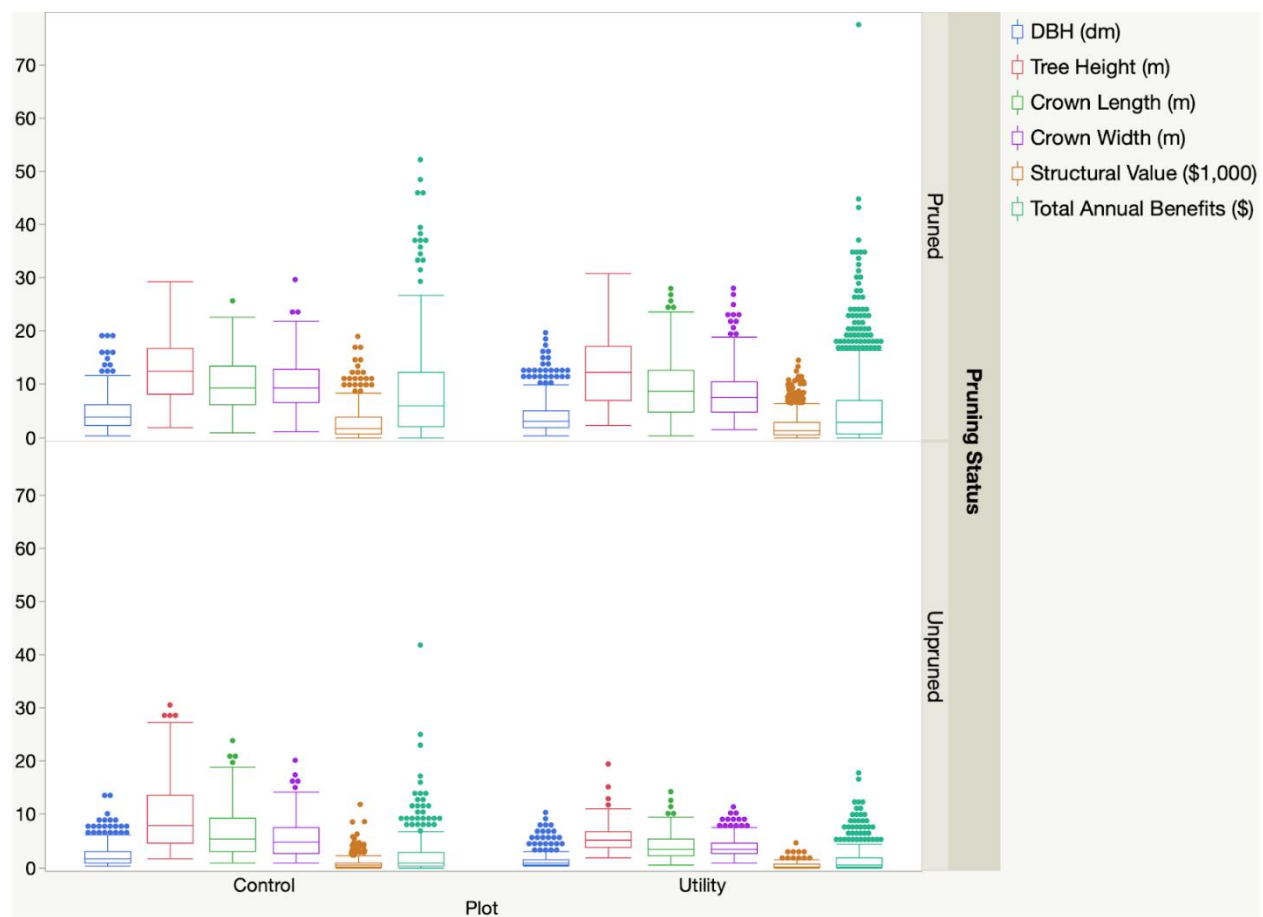

**Figure S1.** Box and whisker plot showing distribution of selected measurements (trunk diameter measured 1.4 m above ground or “DBH”, tree height, crown length and width, structural value, and total annual benefits –the latter two are from i-Tree Eco and values are per tree) for each combination of main effects (control and utility plots; pruned and unpruned trees). Upper and lower boundaries of the boxes are the third and first quartiles, respectively; lines inside the boxes indicate medians; whiskers indicate maximum and minimum values excluding outliers, shown as dots beyond the whiskers.
